# Supplementary material
Source: Elsevier journal article supplement (https://www.sciencedirect.com/science/article/pii/S0213911115002125)
Supplement: mmc1 [file S0213911115002125:mmc1.doc]

**Apéndice *online***

**Tabla I**

Códigos CIE-9-MC utilizados en la definición de los indicadores de hospitalizaciones potencialmente evitables (HPE)

| Indicador | Diagnósticos primarios | Diagnósticos secundarios excluidos | Observaciones |
| --- | --- | --- | --- |
| Enfermedad pulmonar obstructiva crónica (EPOC) | 491.1, 491.2, 491.8, 491.9, 492, 493.2, 494, 496  466.0 o 490 si como diagnósticos secundarios están 491, 492 493 494 496  518.81 o 518.84 si como diagnósticos secundarios están 491.21 491.22 493.21 493.22 494.0 494.1 | - Complicaciones del embarazo, parto y puerperio: 630-679  - Insuficiencia cardiaca congestiva: 428 402.01 402.11 402.91 404.01 404.03 404.11 404.13 404.91 404.93 398.91  - Fibrosis quística: 277.0 747.21 748.3 748.4 748.5 748.6 748.8 748.9 750.3 759.3 770.7 747.31 747.32 747.39  - Trastornos mentales: 295 296 297 298300 301 303.91, 304.01, 304.11, 304.21, 304.31, 304.41, 304.51, 304.61, 304.71, 304.81, 304.91, 316 | Pacientes de 40 años o mayores |
| Insuficiencia cardiaca congestiva (ICC) | 398.91 402.01 402.11 402.91 404.01 404.03 404.11 404.13 404.91 404.93 428.0 428.1 428.20 428.22 428.23 428.30 428.32 428.33 428.40 428.42 428.43 428.9 | - Complicaciones del embarazo, parto y puerperio: 630-679  - EPOC: 491.1, 491.2, 491.8, 491.9, 492, 493.2, 494, 496  - Enfermedad isquémica: 410, 411.1, 411.8, 413  - Insuficiencia renal: 403 404.00 404.02 404.10 404.12 404.90 404.92 584.5 584.6 584.7 584.8 584.9 585 586  - Procedimientos cardiacos excluidos:  00.50 00.51 00.52 00.53 00.54 00.55 00.56 00.57 00.66  35, 36, 37.3, 37.4, 37.5, 37.7, 37.8, 37.94, 37.95, 37.96, 37.98  37.0, 37.1, 37.2 37.6 37.97 | Pacientes de 40 años o mayores |
| Complicaciones a corto plazo en diabetes | 250.10 250.11 250.2 250.3 | - Complicaciones del embarazo, parto y puerperio: 630-679  - Trastornos mentales: 295 296 297 298300 301 303.91, 304.01, 304.11, 304.21, 304.31, 304.41, 304.51, 304.61, 304.71, 304.81, 304.91 | Pacientes de 40 años o mayores |
| Angina no primaria sin procedimiento | 411.1, 411.8, 413 (413.0, 413.1, 413.9) | - Complicaciones del embarazo, parto y puerperio: 630-679  - Procedimientos cardiacos excluidos:  00.50 00.51 00.52 00.53 00.54 00.55 00.56 00.57 00.66  35, 36, 37.3, 37.4, 37.5, 37.7, 37.8, 37.94, 37.95, 37.96, 37.98  37.0, 37.1, 37.2 37.6 37.97 | Sólo admisiones urgentes de pacientes de 40 años o mayores |
| Asma | 493.00, 493.01, 493.02, 493.10, 493.11, 493.12, 493.81, 493.82, 493.90, 493.91, 493.92  518.81 si como diagnósticos secundarios están: 493.00, 493.01, 493.02, 493.10, 493.11, 493.12, 493.81, 493.82, 493.90, 493.91, 493.92 | - Complicaciones del embarazo, parto y puerperio: 630-679  - Insuficiencia cardiaca congestiva: 428 402.01 402.11 402.91 404.01 404.03 404.11 404.13 404.91 404.93 398.91  - Fibrosis quística: 277.0 747.21 748.3 748.4 748.5 748.6 748.8 748.9 750.3 759.3 770.7 747.31 747.32 747.39  - Enfermedades respiratorias: 515, 519.8, 519.9  - EPOC: 491.1, 491.20, 491.21, 491.22, 491.8, 491.9, 492, 493.2, 494, 496  - Trastornos mentales: 295 296 297 298300 301 303.91, 304.01, 304.11, 304.21, 304.31, 304.41, 304.51, 304.61, 304.71, 304.81, 304.91, 316 | Pacientes de 40 años o mayores |
| Deshidratación | 276.0, 276.1, 276.5, (276.50, 276.51, 276.52) |  | Pacientes de 65 años o mayores |
| HPE total | Suma de los casos de EPOC, ICC, asma, complicaciones a corto plazo de diabetes, angina sin procedimiento, asma, deshidratación | | Pacientes de 40 años o mayores |

**Tabla II**

Estimaciones resultantes de la modelización multinivel tipo Poisson para las siete condiciones analizadas

|  |  | Razón de incidencia | Intervalo de confianza del 95% | Error  estándar | z | p >|z| |
| --- | --- | --- | --- | --- | --- | --- |
| EPOC | Ratio 65-79/80 | 1,39 | 1,36-1,39 | 0,0048 | 93,85 | 0,00 |
| % Hombres | 0,93 | 0,92-0 ,93 | 0,0040 | −17,65 | 0,00 |
| Constante | 0,06 | 0,04-0,09 | 0,0124 | −13,18 | 0,00 |
| ICC | Ratio 65-79/80 | 1,06 | 1,05-1,06 | 0,0042 | 13,65 | 0,00 |
| % Hombres | 1,04 | 1,03-1,05 | 0,0050 | 8,97 | 0,00 |
| Constante | 0,0003 | 0,0002-0,0004 | 0,0001 | −35,04 | 0,00 |
| Angina | Ratio 65-79/80 | 1,89 | 1,86-1,91 | 0,0123 | 97,42 | 0,00 |
| % Hombres | 0,76 | 0,74-0 ,77 | 0,0065 | −32,53 | 0,00 |
| Constante | 164,56 | 70,69-383,08 | 70,944 | 11,84 | 0,00 |
| Asma | Ratio 65-79/80 | 1,48 | 1,44-1,51 | 0,0164 | 34,89 | 0,00 |
| % Hombres | 0,91 | 0,89-0,94 | 0,0128 | −6,7 | 0,00 |
| Constante | 0,01 | 0,003-0 ,04 | 0,0077 | −6,48 | 0,00 |
| Diabetes | Ratio 65-79/80 | 1,22 | 1,18-1,26 | 0,0194 | 12,49 | 0,00 |
| % Hombres | 0,93 | 0,90-0 ,95 | 0,0134 | −5,22 | 0,00 |
| Constante | 0,003 | 0,001-0,012 | 0,0021 | −8,18 | 0,00 |
| Deshidratación | Ratio 65-79/80 | 0,68 | 0,66-0,69 | 0,0086 | −31,23 | 0,00 |
| % Hombres | 1,14 | 1,12-1,17 | 0,0144 | 10,58 | 0,00 |
| Constante | 1,10 e-6 | 3,32e-07-3,68e-06 | 6,78 e-7 | −22,36 | 0,00 |
| HPE total | Ratio 65-79/80 | 1,31 | 1,30-1,31 | 0,0030 | 115,58 | 0,00 |
| % Hombres | 0,94 | 0,94-0,95 | 0,0027 | −19,78 | 0,00 |
| Constante | 0,06 | 0,05-0,079 | 0,0086 | −19,52 | 0,00 |

Los modelos se ajustaron para el número de casos observados en cada unidad geográfica y año (variable dependiente), utilizando como variables explicativas la edad (para recoger su efecto exponencial en la aparición de enfermedades crónicas, la edad se definió como la razón de la población entre 65 y 79 años respecto a la población mayor de 80 años), la proporción de hombres residentes, el área de residencia de los pacientes y el año en que se produjo la admisión.

**Tabla III**

Evolución de las hospitalizaciones potencialmente evitables en las 17 comunidades autónomas. Tasas estandarizadas por 10.000 habitantes mayores de 40 años. 2002-2013

|  | 2002 | 2003 | 2004 | 2005 | 2006 | 2007 | 2008 | 2009 | 2010 | 2011 | 2012 | 2013 | CPA | Periodo |
| --- | --- | --- | --- | --- | --- | --- | --- | --- | --- | --- | --- | --- | --- | --- |
| Andalucía | 56,72 | 58,43 | 53,30 | 56,11 | 47,01 | 54,30 | 47,76 | 42,16 | 38,75 | 37,26 | 35,58 | 33,95 | −5,1a | 2002-2013 |
| Aragón | 85,52 | 90,83 | 87,29 | 97,28 | 83,66 | 96,33 | 86,70 | 75,72 | 77,26 | 75,09 | 76,96 | 77,28 | −1,8a | 2002-2013 |
| Asturias | 100,97 | 105,80 | 94,03 | 103,29 | 95,52 | 119,24 | 102,88 | 96,93 | 82,24 | 79,37 | 80,56 | 74,71 | 1,70 | 2002-2007 |
|  |  |  |  |  |  |  |  |  |  |  |  |  | −6,2a | 2007-2013 |
| País Vasco | 81,62 | 81,46 | 80,61 | 92,67 | 77,29 | 89,98 | 80,23 | 73,88 | 55,13 | 64,68 | 63,29 | 58,73 | −3,5a | 2002-2013 |
| Valencia | 67,68 | 73,36 | 69,17 | 74,17 | 61,14 | 70,09 | 61,12 | 58,34 | 55,53 | 54,07 | 54,46 | 50,19 | −3,2a | 2002-2013 |
| Cataluña | 101,09 | 96,96 | 87,54 | 100,59 | 86,51 | 104,38 | 87,41 | 82,35 | 74,65 | 69,52 | 69,74 | 60,75 | −4,1a | 2002-2013 |
| Canarias | 31,96 | 31,71 | 30,13 | 31,65 | 29,39 | 30,61 | 24,68 | 23,72 | 22,22 | 24,60 | 24,71 | 21,48 | −3,7a | 2002-2013 |
| Navarra | 81,67 | 84,11 | 75,44 | 83,38 | 69,06 | 78,56 | 72,75 | 69,03 | 60,99 | 62,53 | 63,72 | 57,17 | −3,2a | 2002-2013 |
| Murcia | 73,21 | 78,91 | 72,47 | 85,56 | 76,53 | 91,74 | 76,72 | 73,94 | 69,43 | 64,97 | 67,45 | 65,71 | 2,40 | 2002-2007 |
|  |  |  |  |  |  |  |  |  |  |  |  |  | −4,6a | 2007-2013 |
| Baleares | 72,54 | 86,68 | 77,59 | 83,77 | 68,12 | 74,14 | 66,83 | 65,40 | 56,45 | 55,31 | 57,62 | 52,16 | −4,1a | 2002-2013 |
| Galicia | 74,09 | 79,02 | 74,71 | 80,00 | 70,04 | 75,09 | 64,25 | 58,69 | 54,23 | 53,50 | 54,62 | 52,49 | −4,1a | 2002-2013 |
| Extremadura | 81,00 | 86,10 | 83,37 | 94,99 | 78,94 | 90,37 | 72,21 | 73,17 | 73,36 | 71,06 | 70,72 | 62,19 | −2,6a | 2002-2013 |
| La Rioja | 104,10 | 110,91 | 110,94 | 138,73 | 99,81 | 125,69 | 106,97 | 89,91 | 85,54 | 74,66 | 76,20 | 68,52 | 7,70 | 2002-2005 |
|  |  |  |  |  |  |  |  |  |  |  |  |  | −7,6a | 2005-2013 |
| Cantabria | 82,26 | 89,73 | 78,82 | 89,27 | 78,11 | 88,94 | 75,08 | 73,46 | 65,66 | 65,33 | 65,74 | 59,78 | −3,3a | 2002-2013 |
| Castilla-La Mancha | 112,53 | 111,42 | 106,61 | 117,35 | 83,80 | 99,07 | 97,58 | 91,73 | 77,84 | 84,20 | 78,83 | 69,72 | −4,1a | 2002-2013 |
| Madrid | 51,58 | 56,77 | 55,05 | 59,92 | 50,32 | 58,73 | 49,02 | 49,37 | 44,95 | 45,24 | 43,93 | 40,58 | −2,8a | 2002-2013 |
| Castilla-León | 80,20 | 84,73 | 88,79 | 100,15 | 90,41 | 106,00 | 93,85 | 89,66 | 80,88 | 79,44 | 80,05 | 75,70 | 4,2a | 2002-2007 |
|  |  |  |  |  |  |  |  |  |  |  |  |  | −5,0a | 2007-2013 |

CPA: cambio porcentual anual.

aCambio porcentual anual significativo en el periodo correspondiente.
